## RESEARCH ARTICLE

# Re-examination of the risk of dementia after dengue virus infection: A population-based cohort study

Yu-Wen Chien<sup>1,2</sup>, Hsin-I Shih<sup>3,4</sup>, Yu-Ping Wang<sup>1,5</sup>, Chia-Yu Chi<sup>5,6,7\*</sup>

**1** Department of Public Health, College of Medicine, National Cheng Kung University, Tainan, Taiwan, **2** Department of Occupational and Environmental Medicine, National Cheng Kung University Hospital, College of Medicine, National Cheng Kung University, Tainan, Taiwan, **3** Department of Emergency Medicine, National Cheng Kung University Hospital, College of Medicine, National Cheng Kung University, Tainan, Taiwan, **4** School of Medicine, College of Medicine, National Cheng Kung University, Tainan, Taiwan, **5** National Mosquito-Borne Diseases Control Research Center, National Health Research Institutes, Miaoli County, Taiwan, **6** National Institute of Infectious Diseases and Vaccinology, National Health Research Institutes, Miaoli County, Taiwan, **7** Department of Microbiology & Immunology, College of Medicine, National Cheng Kung University, Tainan, Taiwan

✉ These authors contributed equally to this work.

\* [pedchi@nhri.org.tw](mailto:pedchi@nhri.org.tw)

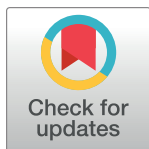

## OPEN ACCESS

**Citation:** Chien Y-W, Shih H-I, Wang Y-P, Chi C-Y (2023) Re-examination of the risk of dementia after dengue virus infection: A population-based cohort study. *PLoS Negl Trop Dis* 17(12): e0011788. <https://doi.org/10.1371/journal.pntd.0011788>

**Editor:** Mabel Carabali, McGill University Faculty of Medicine and Health Sciences, CANADA

**Received:** March 15, 2023

**Accepted:** November 9, 2023

**Published:** December 6, 2023

**Copyright:** © 2023 Chien et al. This is an open access article distributed under the terms of the [Creative Commons Attribution License](https://creativecommons.org/licenses/by/4.0/), which permits unrestricted use, distribution, and reproduction in any medium, provided the original author and source are credited.

**Data Availability Statement:** This study used national databases obtained from the Health and Welfare Data Science Center (HWDC), Ministry of Health and Welfare in Taiwan (<https://dep.mohw.gov.tw/dos/cp-5119-59201-113.html>). All data obtained were anonymized and deidentified by the HWDC. The data used in this study must be accessed and analyzed in the HWDC after filling out an application according to the relevant regulations and thus cannot be shared. Contact information for data application, analysis and inquiry (<https://dep.mohw.gov.tw/dos/cp-2516-59203-113.html>).

## Abstract

Dengue infection can affect the central nervous system and cause various neurological complications. Previous studies also suggest dengue was associated with a significantly increased long-term risk of dementia. A population-based cohort study was conducted using national health databases in Taiwan and included 37,928 laboratory-confirmed dengue patients aged  $\geq 45$  years between 2002 and 2015, along with 151,712 matched non-dengue individuals. Subdistribution hazard regression models showed a slightly increased risk of Alzheimer's disease, and unspecified dementia, non-vascular dementia, and overall dementia in dengue patients than the nondengue group, adjusted for age, sex, area of residence, urbanization level, income, comorbidities, and all-cause clinical visits within one year before the index date. After considering multiple comparisons using Bonferroni correction, only overall dementia and non-vascular dementia remained statistically significant (adjusted SHR 1.13, 95% CI 1.05–1.21,  $p = 0.0009$ ; E-value 1.51, 95% CI 1.28–NA). Sensitivity analyses in which dementia cases occurring in the first three or five years after the index dates were excluded revealed no association between dengue and dementia. In conclusion, this study found dengue patients had a slightly increased risk of non-vascular dementia and total dementia than those without dengue. However, the small corresponding E-values and sensitivity analyses suggest the association between dengue and dementia may not be causal.

## Author summary

Dengue fever is a mosquito-borne disease caused by the dengue virus. Dengue infection has been shown to affect the central nervous system and cause various complications during the acute stage. Two previous studies suggested that dengue virus had a long-term effect on the risk of developing dementia, but there were limitations in disease diagnosis

**Funding:** This study was supported by grants from National Health Research Institutes (MR-110-GP-03 [CYC]), National Science and Technology Council, Taiwan (MOST 107-2314-B-006-075-MY3 [YWC], MOST 110-2625-M-006-009 [HIS], MOST 111-2625-M-006-016 [HIS]), and National Cheng Kung University Hospital (NCKUH-11103007 [HIS], NCKUH-11203040 [HIS]). The funders had no role in the study design, data collection and analysis, decision to publish, or preparation of the manuscript. Funder's website: Ministry of Science and Technology, Taiwan: <https://www.most.gov.tw/>, National Health Research Institutes: <https://www.nhri.edu.tw/>, National Cheng Kung University Hospital: <https://web.hosp.ncku.edu.tw/nckm/>.

**Competing interests:** The authors have declared that no competing interests exist.

in the studies. Our study found that dengue was associated with a slightly increased risk of dementia. However, the small corresponding E values suggest that the association between dengue and dementia was less likely to be causal.

## Introduction

Dengue is caused by the dengue virus (DENV), which has four distinct but closely related serotypes (DENV1–4) and belongs to the family *Flaviviridae*, genus *Flavivirus*. Dengue is transmitted by *Aedes aegypti* and *Aedes albopictus* mosquitoes and has rapidly spread worldwide in recent decades, likely due to a combination of factors, including global warming, unplanned urbanization, and increased international travel and trade [1]. It has been estimated that about 390 million DENV infections occur per year, of which 96 million manifest clinically with a broad spectrum of manifestations ranging from subclinical disease, mild febrile illness to severe dengue, formerly called dengue hemorrhagic fever or dengue shock syndrome [1,2].

Several flaviviruses, such as Japanese encephalitis virus, West Nile virus, and Zika virus, can infect human nervous system cells and cause neurological damage [3]. Cumulative evidence suggests that DENV infection can also affect the central nervous system and cause various neurological complications, such as encephalitis, encephalopathy, meningitis, stroke, cerebellar syndrome, transverse myelitis, and acute disseminated encephalomyelitis [4,5]. In addition to these neurological disorders during acute infection, two previous studies have investigated whether DENV infection had a long-term effect on the risk of developing dementia using the National Health Insurance Research Database (NHIRD) in Taiwan. The results showed that dengue patients had a significantly higher risk of dementia than people without dengue, with adjusted hazard ratios of 2.23 [95% confidence interval (CI) 1.51–3.53] [6] and 1.71 (95% CI 1.03–2.83) [7], respectively. However, dengue cases in these two studies were identified based on clinical diagnosis, not laboratory-confirmed. Furthermore, these two studies included 398 and 816 dengue cases, respectively, because only a small subset of the NHIRD was used. Recently, the Taiwan's Centers for Disease Control (Taiwan CDC) released the Notifiable Disease Dataset of Confirmed Cases (NDDCC) to be linked with the NHIRD. We obtained the list of laboratory-confirmed dengue patients from the dataset and found that the accuracy of dengue diagnosis in the previous two studies was only 46.0% and 64.1%, respectively.

Considering the rising incidence of dengue and the aging population globally, it is essential to investigate the association between dengue and dementia to better estimate the disease burden caused by DENV. It can be challenging to select uninfected individuals for comparison in countries where dengue fever is prevalent, and most people have been infected multiple times [8]. Nonetheless, in Taiwan, with its low incidence of dengue and availability of comprehensive national databases, we have an exceptional opportunity to conduct cohort studies with long followup. Therefore, the objective of this study was to include all laboratory-confirmed dengue cases diagnosed between 2002 and 2015 and the entire NHIRD in Taiwan to re-examine the risk of dementia after DENV infection.

## Materials and methods

### Ethics statement

This study was approved by the Institutional Review Board of National Cheng Kung University Hospital (B-ER-106-184) and National Health Research Institutes (EC1100107-E). All the data were deidentified, and thus, the requirement for informed consent was waived.

## Data source and study population

The single-player National Health Insurance (NHI) Program was launched in 1995 and currently covers 99.9% of over 23 million population in Taiwan [9]. The NHIRD, derived from the claim data from this program and maintained by the Health and Welfare Data Science Center, has been widely used for academic research. Encrypted identification numbers are used to protect personal information, and the database can be linked to dozens of databases from Taiwan's public health and welfare system for academic research purposes.

Newly laboratory-confirmed dengue cases between 2002 and 2015 were identified using the NDDCC database. The laboratory criteria for confirmed cases during the study period included: 1) isolation of DENV; 2) detection of DENV nucleic acid by real-time reverse transcription-quantitative polymerase chain reaction (RT-qPCR); 3) detection of high-titer anti-DENV IgM or IgG using capture ELISAs in the acute stage up until 2009; 4) a four-fold or greater increase in IgG titer between paired acute- and convalescent-phase serum samples [10]; 5) positive nonstructural protein 1 (NS1) testing using the DENV NS1 Ag strip rapid test kit [11,12]. Patients who did not have valid ID numbers, gender information, or birth year information were excluded. In addition, we set the date of symptom onset as the index date for each dengue case, and all of the included subjects must fulfill the following criteria: 1) aged 45 or above [6]; 2) without any diagnosis of dementia before the index date; 3) surviving for more than 30 days from the index date. For each dengue patient, four nondengue control subjects were randomly selected from all enrollees of the NHI Program in Taiwan and individually matched based on age, sex, area of residence, and the index date after excluding those with missing information or a diagnosis of dengue. The matched nondengue subjects shared the same index date as their corresponding dengue patients, and individuals with a dementia diagnosis prior to the index date or those who passed away within 30 days following the index date were excluded.

## Study outcome and follow-up

In this study, dementia was classified into three types: Alzheimer's disease, vascular disease, and unspecified dementia, as previously done by Chu *et al.* [6]. Firstly, the identification of Alzheimer's disease relied on not only the specific ICD-9-CM code of 331.0 and ICD-10-CM code of G30 but also other dementia ICD-9/10-CM codes with the prescription of medications, including cholinesterase inhibitors and memantine (S1 Table). Then vascular dementia was identified in patients without Alzheimer's disease by the specific ICD-9-CM code of 290.4 and ICD-10-CM code of F01. After excluding Alzheimer's disease and vascular dementia, subjects with the other ICD-9/10-CM codes listed in the y Table were defined as patients with unspecified dementia. Dementia cases were defined by at least two outpatient visits or one hospital admission with the relevant ICD-9/10-CM codes or medication documented by board-certified neurologists or psychiatrists during the follow-up period. Furthermore, given that vascular dementia is more closely associated with comorbidities such as hypertension, hyperlipidemia, and diabetes, and it has a distinct pathogenesis from Alzheimer's disease and unspecified dementia, we have grouped the latter two as non-vascular dementia. All subjects in the study cohort were followed up from the index dates to the end of 2018 unless the study outcome or death occurred first.

## Covariates

The personal characteristics and socioeconomic variables considered in this study included age, sex, area of residence, level of urbanization [13] and monthly income. The Charlson Comorbidity Index (CCI) [14] and diseases potentially affecting mental health, including

cerebrovascular diseases, traumatic brain injury, hypertension, dyslipidemia, diabetes mellitus, depressive disorder, alcohol use disorder, substance use disorder, were also considered as potential confounders to assess comorbid conditions of the dengue cases and nondengue subjects, based on relevant ICD-9-CM codes from at least three outpatient visits or one hospital admission before the index dates. Additionally, the all-cause outpatient visits within the previous year of the index dates were calculated to control potential detection bias due to healthcare usage.

### Statistical analysis

The comparisons between the dengue and nondengue groups were performed using the standardized mean difference (SMD), and an SMD < 0.1 indicated a negligible difference between groups [15]. The incidence rates of total dementia and different dementia types were calculated as the number of new events during follow-up divided by the total follow-up time after DENV infection in person-years. Kaplan–Meier curves were plotted, along with the log-rank test, to compare the incidence of dementia in the two groups. The association of dementia and dengue was evaluated by the subdistribution hazard ratios (SHRs) and 95% CIs obtained from the Fine-Gray subdistribution hazard models, adjusted for the abovementioned covariates and the competing risk of death. Subgroup analyses stratified by sex were performed to evaluate whether the effect of DENV on dementia differed by sex.

As done by Chu *et al.* [6] to account for the insidious onset of dementia, we performed sensitivity analyses in which dementia cases occurring in the first three or five years after the index date were excluded to reduce the possibility of underdiagnosis of occult dementia at the time of DENV infection. All data analyses in this study were performed using SAS 9.4 (SAS Institute, Cary, NC). A post hoc Bonferroni correction was applied to derive an adjusted threshold for p values to correct multiple comparisons for four different outcomes and stratified analyses by sex. For results with statistical significance, the E-value was calculated to assess the robustness of the association to potential unmeasured or uncontrolled confounding [16,17].

## Results

We identified 37,928 confirmed dengue cases aged  $\geq 45$  years between 2002 and 2015, along with 151,712 matched nondengue individuals in this study. The mean age of the two groups was  $60.71 \pm 10.05$  years old. The follow-up time in the dengue (median 3.32 years, IQR 3.20–4.26 years) and nondengue groups (median 3.32 years, IQR 3.19–4.25 years) was also similar. The baseline characteristics among dengue and nondengue groups are shown in Table 1. Dengue patients had a higher proportion of dyslipidemia, higher incomes, and urbanized areas than those without dengue, as indicated by SMDs (Table 1). They also had more all-cause clinical visits one year before the index date. Other baseline characteristics and comorbidities did not differ significantly between groups. The Kaplan–Meier curves showed a higher risk of dementia among dengue patients than the control group (log-rank test  $p = 0.0014$ , Fig 1).

The results of the subdistribution hazard models, which compare the risk of dementia between the dengue and nondengue groups, are presented in Table 2. To account for multiple testing, the Bonferroni post hoc method required a significance level of  $p < 0.0033$  (4 different outcomes and stratified analyses by sex; total 15 tests in Table 2). Subdistribution hazard models showed a slightly increased risk of Alzheimer's disease, unspecified dementia, non-vascular dementia, and overall dementia in dengue patients than the nondengue group, adjusted for age, sex, area of residence, urbanization level, income, comorbidities, CCI score, and all-cause clinical visits within one year before the index date. After considering multiple comparisons,

**Table 1. Baseline characteristics and incidence of dementia among dengue and nondengue groups.**

|                                                                 | Dengue (n = 37928) | Nondengue (n = 151712) | SMD    |
|-----------------------------------------------------------------|--------------------|------------------------|--------|
| Age (mean, SD)                                                  | 60.71 (10.05)      | 60.71 (10.05)          |        |
| Sex (n, %)                                                      |                    |                        |        |
| Male                                                            | 17562 (46.3)       | 70248 (46.3)           |        |
| Female                                                          | 20366 (53.7)       | 81464 (53.7)           |        |
| Area (n, %)                                                     |                    |                        |        |
| Tainan                                                          | 13453 (35.5)       | 53812 (35.5)           |        |
| Kaohsiung                                                       | 22823 (60.2)       | 91292 (60.2)           |        |
| Pingtung                                                        | 850 (2.2)          | 3400 (2.2)             |        |
| Others                                                          | 802 (2.1)          | 3208 (2.1)             |        |
| Dementia-related comorbidities (n, %)                           |                    |                        |        |
| Cerebrovascular disease                                         | 3816 (10.1)        | 14859 (9.8)            | 0.009  |
| Traumatic brain injury                                          | 2328 (6.1)         | 11232 (7.4)            | 0.049  |
| Hypertension                                                    | 16873 (44.5)       | 62990 (41.5)           | 0.060  |
| Dyslipidemia                                                    | 14153 (37.3)       | 49476 (32.6)           | 0.100* |
| Diabetes mellitus                                               | 8562 (22.6)        | 32114 (21.2)           | 0.034  |
| Depressive disorder                                             | 3620 (9.5)         | 12279 (8.1)            | 0.052  |
| Alcohol use disorder                                            | 214 (0.6)          | 1012 (0.7)             | 0.013  |
| Substance use disorder                                          | 609 (1.6)          | 2490 (1.6)             | 0.003  |
| CCI score (mean, SD)                                            | 1.83 (2.17)        | 1.71 (2.18)            | 0.057  |
| Urbanization level (n, %)                                       |                    |                        |        |
| Urban                                                           | 29471 (77.7)       | 84613 (55.8)           | 0.460* |
| Suburban                                                        | 8053 (21.2)        | 55633 (36.7)           | 0.326* |
| Rural                                                           | 404 (1.1)          | 11466 (7.6)            | 0.249* |
| Income (n, %)                                                   |                    |                        |        |
| Not-employed                                                    | 7339 (19.4)        | 30023 (19.8)           | 0.011  |
| Low                                                             | 13598 (35.6)       | 63935 (42.1)           | 0.128* |
| High                                                            | 16991 (44.8)       | 57754 (38.1)           | 0.138* |
| Incidence of any dementia (n, %)                                | 1132 (3.0)         | 4002 (2.6)             | 0.021  |
| Age at diagnosis of any dementia (mean, SD)                     | 76.58 (7.62)       | 76.45 (7.74)           |        |
| Duration between enrollment and dementia (years, SD)            | 4.66 (4.33)        | 4.70 (4.29)            |        |
| Dementia type (n, %)                                            |                    |                        |        |
| Alzheimer's disease                                             | 311 (0.8)          | 1046 (0.7)             | 0.015  |
| Vascular dementia                                               | 139 (0.4)          | 509 (0.3)              | 0.005  |
| Unspecified dementia                                            | 682 (1.8)          | 2447 (1.6)             | 0.015  |
| All-cause clinical visits one year before index date (mean, SD) | 21.93 (19.19)      | 19.90 (19.18)          | 0.106* |

SD: standard deviation; SMD: standardized mean difference; CCI: Charlson Comorbidity Index

\* Indicating SMD > 0.1

<https://doi.org/10.1371/journal.pntd.0011788.t001>

only non-vascular dementia (adjusted SHR 1.13, 95% CI 1.05–1.22,  $p = 0.0010$ , Table 2) and overall dementia (adjusted SHR 1.13, 95% CI 1.05–1.21,  $p = 0.0009$ ) remained statistically significant. The corresponding E-values were 1.51 (95% CI 1.28-NA) and 1.51 (95% CI 1.28-NA), respectively. Stratified analyses by sex showed that only male dengue patients had a significantly increased risk of non-vascular dementia (adjusted SHR 1.22, 95% CI 1.09–1.36,  $p = 0.0004$ ; E-value 1.74, 95% CI 1.40-NA) and overall dementia (adjusted SHR 1.20, 95% CI 1.08–1.33,  $p = 0.0005$ ; E-value 1.69, 95% CI 1.37-NA). No significant association between DENV infection and dementia was observed in females.

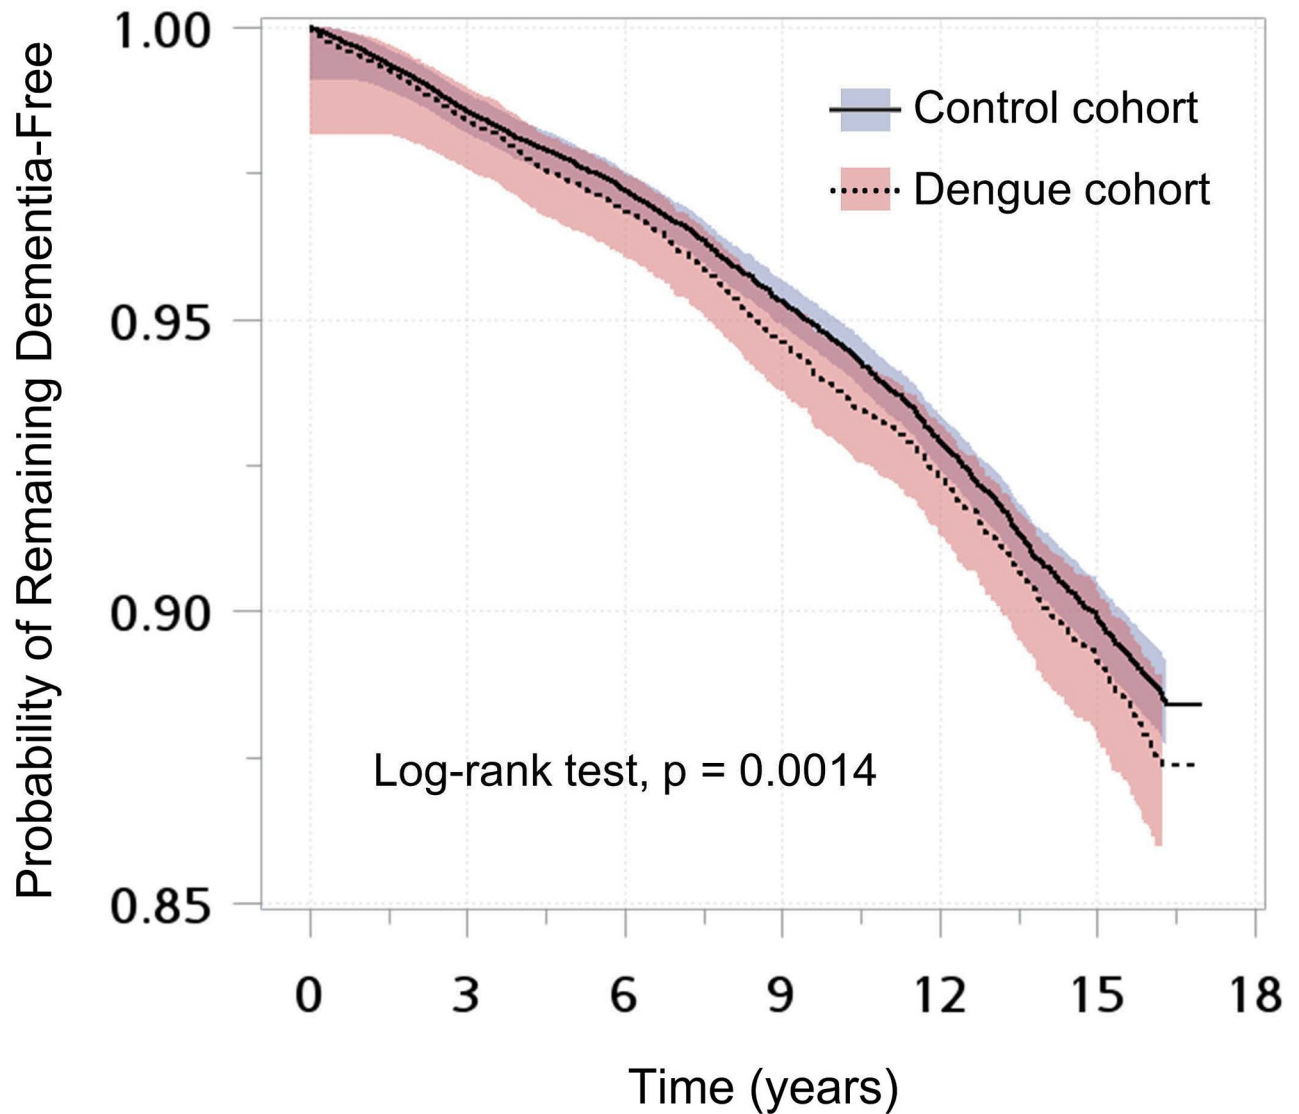

**Fig 1. Kaplan-Meier curves with 95% confidence intervals of developing any dementia among patients with dengue and control group.**

<https://doi.org/10.1371/journal.pntd.0011788.g001>

The results of sensitivity analyses are shown in [Table 3](#). Although four adjusted SHRs in the sensitivity analyses had p-values < 0.05, the smallest p-value was 0.0205, indicating all the SHRs were not statistically significant after considering multiple testing.

## Discussion

Our study found slightly increased risks of non-vascular and overall dementia in dengue patients, particularly in males. However, these associations were not observed in the sensitivity analyses, which excluded dementia cases occurring in the first few years of follow-up to avoid under-diagnosis of occult dementia when and shortly after dengue was diagnosed. In addition, the corresponding E-values and their lower confidence limits were not very large, implying that the evidence of causality was very weak because little unmeasured confounding could explain away the observed associations [16,17]. Hence, our study did not provide robust

**Table 2. Risk of developing dementia among dengue patients and nondengue controls.**

|                       | Total                                  |                      | Male                                   |                      | Female                                 |                      |
|-----------------------|----------------------------------------|----------------------|----------------------------------------|----------------------|----------------------------------------|----------------------|
|                       | SHR <sup>a</sup> (95% CI) <sup>b</sup> | p-value <sup>c</sup> | SHR <sup>a</sup> (95% CI) <sup>b</sup> | p-value <sup>c</sup> | SHR <sup>a</sup> (95% CI) <sup>b</sup> | p-value <sup>c</sup> |
| Alzheimer's disease   | 1.16 (1.01–1.32)                       | 0.0330               | 1.31 (1.07–1.62)                       | 0.0102               | 1.06 (0.89–1.26)                       | 0.4942               |
| Vascular dementia     | 1.06 (0.87–1.29)                       | 0.5719               | 1.08 (0.83–1.41)                       | 0.5724               | 1.03 (0.77–1.36)                       | 0.8653               |
| Unspecified dementia  | 1.12 (1.02–1.22)                       | 0.0128               | 1.18 (1.04–1.34)                       | 0.0118               | 1.08 (0.95–1.22)                       | 0.2379               |
| Non-vascular dementia | 1.13 (1.05–1.22)                       | 0.0010*              | 1.22 (1.09–1.36)                       | 0.0004*              | 1.07 (0.97–1.19)                       | 0.1791               |
| Overall dementia      | 1.13 (1.05–1.21)                       | 0.0009*              | 1.20 (1.08–1.33)                       | 0.0005*              | 1.07 (0.97–1.18)                       | 0.1670               |

<sup>a</sup> Subdistribution hazard ratio adjusted by age, sex, area of residence, urbanization level, income, comorbidities, CCI score, and all-cause clinical visits.

<sup>b</sup> 95% CIs were not adjusted for multiple comparisons and thus cannot be directly used for hypothesis testing or inference.

<sup>c</sup> Post hoc adjustment for multiple comparisons by the Bonferroni method required a significance level of  $p < 0.0033$ .

\*Achieved statistical significance after Bonferroni correction for multiple comparisons ( $p < 0.0033$ ).

<https://doi.org/10.1371/journal.pntd.0011788.t002>

evidence to support a causal link between DENV infection and dementia. Our findings contrast with two previous studies that reported more substantial association between dengue and dementia (HRs of 2.23 and 1.71), where the associations remained statistically significant in sensitivity analyses [6,7]. Several factors could account for these discrepancies. Firstly, the dengue patients in the previous studies were diagnosed based on clinical presentation, rather than laboratory confirmation, because DENV NS1 rapid tests were not widely available before 2014

**Table 3. Sensitivity analyses of developing any dementia among patients with dengue and controls.**

| Dengue (Yes vs No)    | Exclusion of observation period |         |                        |         |
|-----------------------|---------------------------------|---------|------------------------|---------|
|                       | > 3 years <sup>a</sup>          |         | > 5 years <sup>b</sup> |         |
|                       | SHR <sup>c</sup>                | p-value | SHR <sup>c</sup>       | p-value |
| <b>All dengue</b>     |                                 |         |                        |         |
| Alzheimer's disease   | 1.09 (0.90–1.32)                | 0.3892  | 0.93 (0.75–1.17)       | 0.5572  |
| Vascular dementia     | 0.98 (0.75–1.29)                | 0.8875  | 0.97 (0.71–1.33)       | 0.8453  |
| Unspecified dementia  | 1.16 (1.01–1.32)                | 0.0304  | 1.11 (0.95–1.30)       | 0.1935  |
| Non-vascular dementia | 1.14 (1.02–1.27)                | 0.0205  | 1.05 (0.92–1.20)       | 0.4449  |
| Overall dementia      | 1.12 (1.01–1.24)                | 0.0314  | 1.04 (0.92–1.18)       | 0.4931  |
| <b>Male dengue</b>    |                                 |         |                        |         |
| Alzheimer's disease   | 1.24 (0.92–1.67)                | 0.1535  | 0.98 (0.69–1.40)       | 0.9181  |
| Vascular dementia     | 0.85 (0.57–1.27)                | 0.4283  | 0.84 (0.52–1.35)       | 0.4639  |
| Unspecified dementia  | 1.15 (0.94–1.40)                | 0.1670  | 1.01 (0.79–1.28)       | 0.9675  |
| Non-vascular dementia | 1.18 (1.00–1.39)                | 0.0469  | 1.00 (0.82–1.22)       | 0.9801  |
| Overall dementia      | 1.12 (0.96–1.31)                | 0.1375  | 0.97 (0.81–1.17)       | 0.7554  |
| <b>Female dengue</b>  |                                 |         |                        |         |
| Alzheimer's disease   | 1.00 (0.78–1.29)                | 0.9741  | 0.91 (0.68–1.22)       | 0.5234  |
| Vascular dementia     | 1.13 (0.78–1.64)                | 0.5254  | 1.10 (0.72–1.70)       | 0.6514  |
| Unspecified dementia  | 1.17 (0.98–1.40)                | 0.0841  | 1.20 (0.97–1.48)       | 0.0941  |
| Non-vascular dementia | 1.12 (0.96–1.29)                | 0.1481  | 1.09 (0.92–1.30)       | 0.3224  |
| Overall dementia      | 1.12 (0.98–1.29)                | 0.0999  | 1.10 (0.94–1.29)       | 0.2442  |

<sup>a</sup> 179487 dengue patients and 717948 nondengue subjects

<sup>b</sup> 38235 dengue patients and 152940 nondengue subjects

<sup>c</sup> Subdistribution hazard ratio adjusted by age, sex, area of residence, urbanization level, income, comorbidities, CCI score, and all-cause clinical visits.

<https://doi.org/10.1371/journal.pntd.0011788.t003>

[18]. Secondly, these studies comprised of only 398 and 816 dengue cases, respectively, since they utilized only a subset of the NHIRD. In contrast, our study incorporated the entirety of the NHIRD and included a total of 37,928 dengue cases. Finally, we applied a post hoc Bonferroni correction to adjust the threshold for p values to correct for multiple comparisons, a step that was not undertaken in the previous studies.

Dengue is considered an acute viral disease. The majority of the patients develop subclinical or mild symptoms. However, in some cases, the disease can progress to severe dengue, which may lead to complications such as severe bleeding, organ impairment, or plasma leakage [1]. Neurological manifestations have been increasingly reported in dengue patients, with prevalence rates ranging from 0.5 to 21% [4,19]. The neuropathogenesis of DENV can be classified into three categories: (1) metabolic disturbance causing encephalopathy; (2) direct viral invasion causing encephalitis, meningitis, myositis, and myelitis; and (3) autoimmune reactions causing diseases such as acute disseminated encephalomyelitis and Guillain-Barré syndrome [6,20]. The two most common neurological complications caused by DENV are encephalopathy and encephalitis [4,6,21]. DENV-induced encephalopathy may present as decreased sensitivity, cognitive dysfunction, seizures, and personality disorders, including sudden mania, depression, anxiety, psychosis, and agoraphobia [4]. Dengue encephalopathy usually occurs in patients with severe dengue, with a mortality rate as high as 46.7% [22]. Nevertheless, mild encephalopathy with rapid onset but reversible cognitive impairment has been reported in dengue patients [23]. Although DENV encephalitis can be mild, with reversible functional deficiencies, it can also result in severe structural damage with corresponding functional defects and sequelae [3,24–30]. We further examined whether patients diagnosed with severe dengue (defined in S2 Table) exhibited a higher risk of subsequent dementia. However, our results indicated that severe dengue was not associated with an increased risk of developing dementia (S3 Table).

Dementia currently ranks as the seventh leading cause of death globally and is one of the major causes of disability and dependency among the elderly population [31]. Dementia is an acquired disorder characterized by a significant decline from one's previous level of cognition involving one or more cognitive domains (learning and memory, language, executive function, complex attention, perceptual-motor, and social cognition) [32]. It should be viewed as a syndrome that develops over time, with various underlying causes, rather than as one particular disease [33]. Cognitive impairment and dementia have been linked to several neurotropic viruses, such as cytomegalovirus, human alphaherpesvirus 1, and alphaherpesvirus 2, probably through neuroinflammation after infection [34–36]. Increased risk of dementia has also been reported in survivors of West Nile virus infection [37]. DENV was considered non-neurotropic before; however, growing evidence of neurotropism and neuro-invasion in dengue has gradually changed this view because DENV can cause various neurological complications during the acute stage [4]. Our study reveals a marginally increased risk of non-vascular dementia and overall dementia among patients with dengue; however, further research is needed to determine whether this association is indeed causal.

Our study has several strengths. First, this population-based cohort study had a large sample size of laboratory-confirmed outpatient and inpatient dengue cases. Second, national medical claims data in Taiwan have a coverage rate of >99.9% of the whole population, minimizing selection bias caused by loss to follow-up in cohort studies. Third, this study controlled many potential confounders, including comorbidities, demographics, and socioeconomic factors. Fourth, the frequency of all-cause clinical visits was adjusted to account for surveillance bias. Fifth, two sensitivity analyses were performed. Sixth, E-values were used to assess the evidence of causality in this observational study [16,17]. Finally, our analyses took into account multiple testing by employing the Bonferroni method, thereby reducing the likelihood of false-positive



findings. While the Bonferroni correction can sometimes be overly conservative, potentially leading to an increased rate of false negatives [38], we have also applied the Holm-Bonferroni method, which provided consistent results.

This study also has some limitations. One major limitation was that the diagnosis of dementia primarily relies on claim data from the NHI Program rather than a standardized assessment of all individuals in the study group. The possibility of missing codes or coding errors might lead to misclassification. In addition, dementia patients who did not seek medical help could not be detected in the NHIRD and might therefore be misclassified. However, we tried to improve the accuracy of dementia diagnosis by using a stricter definition, only ICD codes by neurologists and psychiatrists. We also adjust all-cause clinical visits to minimize potential detection bias. Another limitation was that some nondengue subjects might be misclassified because DENV infections could be asymptomatic or cause mild symptoms and thus be unrecognized or underreported. However, this misclassification bias should be slight since dengue is currently not endemic in Taiwan; therefore, outbreaks are usually concentrated in some hot spots, and the overall incidence and seroprevalence remain low [39–41]. In addition, one of the criteria for laboratory confirmation of dengue involved detecting DENV IgM or IgG in a single serum sample prior to 2009. This method may have resulted in some degree of misclassification due to cross-reactivity with other flaviviruses. Since dengue is not endemic in Taiwan and the seroprevalence was low before 2009, the misclassification bias is unlikely to be significant. However, the Notifiable Disease Dataset of Confirmed Cases, our primary data source, lacks detailed information on the specific laboratory tests employed for diagnosing dengue patients, making it impossible to calculate the proportions of participants diagnosed by each test. Furthermore, with a median follow-up time of only 3.32 years, the sensitivity analyses that excluded dementia cases occurring within the first three or five years of follow-up had a smaller sample size, leading to decreased statistical power. Finally, some risk factors for dementia, such as smoking habits, alcohol use, body weight, daily activity, diet, educational level, and family history, were unavailable in NHIRD.

## Conclusion

In conclusion, this study found dengue patients only had a slightly increased risk of non-vascular dementia and total dementia than those without dengue. However, the small corresponding E values and sensitivity analyses suggest the association between dengue and dementia may not be causal. Additional research is required to definitively establish whether or not there is a causal relationship between dengue infection and dementia.

## Supporting information

**S1 Table. List of ICD codes for identifying diseases in this study.**  
(DOCX)

**S2 Table. Definition of severe dengue.**  
(DOCX)

**S3 Table. Risk of developing dementia among patients with severe dengue and controls.**  
(DOCX)

## Author Contributions

**Conceptualization:** Yu-Wen Chien, Hsin-I Shih, Chia-Yu Chi.

**Data curation:** Yu-Ping Wang.

**Formal analysis:** Yu-Wen Chien.

**Funding acquisition:** Yu-Wen Chien, Chia-Yu Chi.

**Investigation:** Yu-Wen Chien, Hsin-I Shih, Yu-Ping Wang.

**Methodology:** Yu-Wen Chien, Hsin-I Shih.

**Software:** Yu-Ping Wang.

**Writing – original draft:** Yu-Wen Chien, Hsin-I Shih.

**Writing – review & editing:** Yu-Wen Chien, Hsin-I Shih, Chia-Yu Chi.

## References

1. Wilder-Smith A, Ooi EE, Horstick O, Wills B. Dengue. *Lancet*. 2019; 393(10169):350–63. Epub 2019/01/31. [https://doi.org/10.1016/s0140-6736\(18\)32560-1](https://doi.org/10.1016/s0140-6736(18)32560-1) PMID: 30696575.
2. Bhatt S, Gething PW, Brady OJ, Messina JP, Farlow AW, Moyes CL, et al. The global distribution and burden of dengue. *Nature*. 2013; 496(7446):504–7. Epub 2013/04/09. <https://doi.org/10.1038/nature12060> PMID: 23563266
3. Chen T, He X, Zhang P, Yuan Y, Lang X, Yu J, et al. Research advancements in the neurological presentation of flaviviruses. *Rev Med Virol*. 2019; 29(1):e2021. Epub 20181212. <https://doi.org/10.1002/rmv.2021> PMID: 30548722
4. Li GH, Ning ZJ, Liu YM, Li XH. Neurological Manifestations of Dengue Infection. *Front Cell Infect Microbiol*. 2017; 7:449. Epub 2017/11/10. <https://doi.org/10.3389/fcimb.2017.00449> PMID: 29119088
5. Gulati S, Maheshwari A. Atypical manifestations of dengue. *Trop Med Int Health*. 2007; 12(9):1087–95. <https://doi.org/10.1111/j.1365-3156.2007.01891.x> PMID: 17875019.
6. Chu CS, Tsai SJ, Cheng CM, Su TP, Chen TJ, Bai YM, et al. Dengue and dementia risk: A nationwide longitudinal study. *J Infect*. 2021; 83(5):601–6. Epub 2021/08/30. <https://doi.org/10.1016/j.jinf.2021.08.037> PMID: 34454958.
7. Chang SH, Chang R, Su CS, Wei JC, Yip HT, Yang YC, et al. Incidence of dementia after dengue fever: Results of a longitudinal population-based study. *Int J Clin Pract*. 2021; 75(8):e14318. Epub 2021/06/29. <https://doi.org/10.1111/ijcp.14318> PMID: 34180565.
8. Fritzell C, Rousset D, Adde A, Kazanji M, Van Kerkhove MD, Flamand C. Current challenges and implications for dengue, chikungunya and Zika seroprevalence studies worldwide: A scoping review. *PLoS Negl Trop Dis*. 2018; 12(7):e0006533. Epub 30011271. <https://doi.org/10.1371/journal.pntd.0006533>
9. Lin LY, Warren-Gash C, Smeeth L, Chen PC. Data resource profile: the National Health Insurance Research Database (NHIRD). *Epidemiol Health*. 2018; 40:e2018062. Epub 2019/02/08. <https://doi.org/10.4178/epih.e2018062> PMID: 30727703
10. World Health Organization. Laboratory Diagnosis and Diagnostic Tests. Dengue: Guidelines for Diagnosis, Treatment, Prevention and Control: New Edition. WHO Guidelines Approved by the Guidelines Review Committee. Geneva.2009.
11. Chien YW, Wang CC, Wang YP, Lee CY, Perng GC. Risk of Leukemia after Dengue Virus Infection: A Population-Based Cohort Study. *Cancer Epidemiol Biomarkers Prev*. 2020; 29(3):558–64. Epub 2020/02/14. <https://doi.org/10.1158/1055-9965.epi-19-1214> PMID: 32051189.
12. Yeh CY, Chen PL, Chuang KT, Shu YC, Chien YW, Perng GC, et al. Symptoms associated with adverse dengue fever prognoses at the time of reporting in the 2015 dengue outbreak in Taiwan. *PLoS Negl Trop Dis*. 2017; 11(12):e0006091. Epub 2017/12/07. <https://doi.org/10.1371/journal.pntd.0006091> PMID: 29211743
13. Liu CY, Hung YT, Chuang YL, Chen YJ, Weng WS, Liu JS, et al. Incorporating development stratification of Taiwan townships into sampling design of large scale health interview survey. *Journal of Health Management*. 2006; 4(1):1–22.
14. Quan H, Sundararajan V, Halfon P, Fong A, Burnand B, Luthi JC, et al. Coding algorithms for defining comorbidities in ICD-9-CM and ICD-10 administrative data. *Med Care*. 2005; 43(11):1130–9. Epub 2005/10/15. <https://doi.org/10.1097/01.mlr.0000182534.19832.83> PMID: 16224307.
15. Mamdani M, Sykora K, Li P, Normand SL, Streiner DL, Austin PC, et al. Reader's guide to critical appraisal of cohort studies: 2. Assessing potential for confounding. *Bmj*. 2005; 330(7497):960–2. Epub 2005/04/23. <https://doi.org/10.1136/bmj.330.7497.960> PMID: 15845982

16. Haneuse S, VanderWeele TJ, Arterburn D. Using the E-Value to Assess the Potential Effect of Unmeasured Confounding in Observational Studies. *JAMA*. 2019; 321(6):602–3. <https://doi.org/10.1001/jama.2018.21554> PMID: 32051189
17. VanderWeele TJ, Ding P. Sensitivity Analysis in Observational Research: Introducing the E-Value. *Ann Intern Med*. 2017; 167(4):268–74. Epub 2017/07/12. <https://doi.org/10.7326/m16-2607> PMID: 28693043.
18. Shih HI, Chi CY, Tsai PF, Wang YP, Chien YW. Re-examination of the risk of autoimmune diseases after dengue virus infection: A population-based cohort study. *PLoS Negl Trop Dis*. 2023; 17(3): e0011127. Epub 2023/03/07. <https://doi.org/10.1371/journal.pntd.0011127> PMID: 36881559
19. Carod-Artal FJ, Wichmann O, Farrar J, Gascon J. Neurological complications of dengue virus infection. *Lancet Neurol*. 2013; 12(9):906–19. Epub 2013/08/21. [https://doi.org/10.1016/s1474-4422\(13\)70150-9](https://doi.org/10.1016/s1474-4422(13)70150-9) PMID: 23948177.
20. Puccioni-Sohler M, Orsini M, Soares CN. Dengue: a new challenge for neurology. *Neurol Int*. 2012; 4(3):e15. Epub 2013/01/29. <https://doi.org/10.4081/ni.2012.e15> PMID: 23355928
21. Kulkarni R, Pujari S, Gupta D. Neurological Manifestations of Dengue Fever. *Ann Indian Acad Neurol*. 2021; 24(5):693–702. Epub 2022/01/11. [https://doi.org/10.4103/aian.AIAN\\_157\\_21](https://doi.org/10.4103/aian.AIAN_157_21) PMID: 35002126
22. Malavige GN, Ranatunga PK, Jayaratne SD, Wijesiriwardana B, Seneviratne SL, Karunatilaka DH. Dengue viral infections as a cause of encephalopathy. *Indian J Med Microbiol*. 2007; 25(2):143–5. Epub 2007/06/22. <https://doi.org/10.4103/0255-0857.32722> PMID: 17582186.
23. Mathew M, Thomas R, S V, Pulicken M. Severe Dengue with Rapid Onset Dementia, Apraxia of Speech and Reversible Splenic Lesion. *J Neurosci Rural Pract*. 2021; 12(3):608–10. Epub 2021/07/24. <https://doi.org/10.1055/s-0041-1729476> PMID: 34295122. that this article submission conforms to the Declaration of Helsinki. M.M. contributed in the collection of data, writing of the manuscript and references, formatting. R.T. contributed in writing of the manuscript and references, formatting, review. S.V. and M.P. performed article review and editing.
24. Khandaker G, Jung J, Britton PN, King C, Yin JK, Jones CA. Long-term outcomes of infective encephalitis in children: a systematic review and meta-analysis. *Dev Med Child Neurol*. 2016; 58(11):1108–15. Epub 2016/07/16. <https://doi.org/10.1111/dmcn.13197> PMID: 27422743.
25. Filgueira L, Larionov A, Lannes N. The Influence of Virus Infection on Microglia and Accelerated Brain Aging. *Cells*. 2021; 10(7). Epub 2021/07/20. <https://doi.org/10.3390/cells10071836> PMID: 34360004
26. Romer C. Viruses and Endogenous Retroviruses as Roots for Neuroinflammation and Neurodegenerative Diseases. *Front Neurosci*. 2021; 15:648629. Epub 2021/03/12. <https://doi.org/10.3389/fnins.2021.648629> PMID: 33776642
27. Figueiredo CP, Barros-Aragao FGQ, Neris RLS, Frost PS, Soares C, Souza INO, et al. Zika virus replicates in adult human brain tissue and impairs synapses and memory in mice. *Nat Commun*. 2019; 10(1):3890. Epub 2019/09/05. <https://doi.org/10.1038/s41467-019-11866-7> PMID: 31488835
28. Wang J, Liu J, Zhou R, Ding X, Zhang Q, Zhang C, et al. Zika virus infected primary microglia impairs NPCs proliferation and differentiation. *Biochem Biophys Res Commun*. 2018; 497(2):619–25. Epub 2018/02/15. <https://doi.org/10.1016/j.bbrc.2018.02.118> PMID: 29453985.
29. Ireland DDC, Manangeeswaran M, Lewkowicz AP, Engel K, Clark SM, Laniyan A, et al. Long-term persistence of infectious Zika virus: Inflammation and behavioral sequela in mice. *PLoS Pathog*. 2020; 16(12):e1008689. Epub 2020/12/10. <https://doi.org/10.1371/journal.ppat.1008689> PMID: 33301527
30. Lannes N, Neuhaus V, Scolari B, Kharoubi-Hess S, Walch M, Summerfield A, et al. Interactions of human microglia cells with Japanese encephalitis virus. *Virol J*. 2017; 14(1):8. Epub 2017/01/14. <https://doi.org/10.1186/s12985-016-0675-3> PMID: 28088249
31. World Health Organization. Dementia 2022 [updated 20 September 2022; cited 2023 Feb/13/2023].
32. McKhann GM, Knopman DS, Chertkow H, Hyman BT, Jack CR Jr., Kawas CH, et al. The diagnosis of dementia due to Alzheimer's disease: recommendations from the National Institute on Aging-Alzheimer's Association workgroups on diagnostic guidelines for Alzheimer's disease. *Alzheimers Dement*. 2011; 7(3):263–9. Epub 2011/04/21. <https://doi.org/10.1016/j.jalz.2011.03.005> PMID: 21514250
33. Gale SA, Acar D, Daffner KR. Dementia. *Am J Med*. 2018; 131(10):1161–9. Epub 2018/02/10. <https://doi.org/10.1016/j.amjmed.2018.01.022> PMID: 29425707.
34. Sochocka M, Zwolińska K, Leszek J. The Infectious Etiology of Alzheimer's Disease. *Curr Neuropharmacol*. 2017; 15(7):996–1009. Epub 2017/03/16. <https://doi.org/10.2174/1570159x15666170313122937> PMID: 28294067
35. Mawanda F, Wallace R. Can infections cause Alzheimer's disease? *Epidemiol Rev*. 2013; 35(1):161–80. Epub 2013/01/26. <https://doi.org/10.1093/epirev/mxs007> PMID: 23349428

36. Licastro F, Carbone I, Raschi E, Porcellini E. The 21st century epidemic: infections as inductors of neuro-degeneration associated with Alzheimer's Disease. *Immun Ageing*. 2014; 11(1):22. Epub 2014/12/18. <https://doi.org/10.1186/s12979-014-0022-8> PMID: 25516763
37. Balakrishnan A, Thekkekara RJ, Tandale BV. Outcomes of West Nile encephalitis patients after 1 year of West Nile encephalitis outbreak in Kerala, India: A follow-up study. *J Med Virol*. 2016; 88(11):1856–61. Epub 2016/04/12. <https://doi.org/10.1002/jmv.24545> PMID: 27061922.
38. Holm S. A Simple Sequentially Rejective Multiple Test Procedure. *Scandinavian Journal of Statistics*. 1979; 6(2):65–70.
39. Chien YW, Huang HM, Ho TC, Tseng FC, Ko NY, Ko WC, et al. Seroepidemiology of dengue virus infection among adults during the ending phase of a severe dengue epidemic in southern Taiwan, 2015. *BMC Infect Dis*. 2019; 19(1):338. Epub 2019/04/25. <https://doi.org/10.1186/s12879-019-3946-y> PMID: 31014263.
40. Lee YH, Hsieh YC, Chen CJ, Lin TY, Huang YC. Retrospective Seroepidemiology study of dengue virus infection in Taiwan. *BMC Infect Dis*. 2021; 21(1):96. Epub 2021/01/23. <https://doi.org/10.1186/s12879-021-05809-1> PMID: 33478432
41. Hsu JC, Hsieh CL, Lu CY. Trend and geographic analysis of the prevalence of dengue in Taiwan, 2010–2015. *Int J Infect Dis*. 2017; 54:43–9. Epub 2016/11/21. <https://doi.org/10.1016/j.ijid.2016.11.008> PMID: 27865829.
